# Supplementary material for: Mitigating Stress and Supporting Health in Deprived Urban Communities: The Importance of Green Space and the Social Environment
Source: MDPI journal article supplement (doi:10.3390/ijerph13040440), 2016-04-22
Supplement: s1 [file s1]

# Supplementary Materials: Mitigating Stress and Supporting Health in Deprived Urban Communities: The Importance of Green Space and the Social Environment

Catharine Ward Thompson, Peter Aspinall, Jenny Roe, Lynette Robertson and David Miller

In the following sections Correlated Component Regression (CCR) data is shown for each of the Community groups in relation to either perceived stress or general health.

In each case, the first table or tables give the model accuracy for both training and cross validation, followed by the standardized regression coefficients and their breakdown by components, and the Pratt Co-efficient.

Subsequent tables show the chi-squared tests for accuracy of prediction of any green space variables shown to be significant.

**Table S1.** CCR Logistic regression model predicting PSS for Community 1.

| Model Fit                               | Cross-Validation                   |
|-----------------------------------------|------------------------------------|
| Accuracy                                | 0.75 (standard error = 0.02)       |
| AUC (Area under curve)                  | 0.62 (standard error = 0.03)       |
| Predictor variables                     | Standardised Coefficient           |
| Have a garden or allotment <sup>a</sup> | 2.69                               |
| Predictor Table                         | Out of sample frequency (n = 3000) |
| Have a garden or allotment              | 2967                               |
| Predictor Importance                    | Contribution to Model (Pratt)      |
| Have a garden or allotment              | 100% as only one predictor         |

Note: <sup>a</sup> 1 = yes, 2 = no.

**Table S2.** Chi-squared test showing relationship between PSS and having a garden or allotment, Community 1.

| Variable                                   | Lower Stress (PSS) % | Higher Stress (PSS) % | Row Freq (n) |
|--------------------------------------------|----------------------|-----------------------|--------------|
| <b>Have a garden or allotment (before)</b> |                      |                       |              |
| yes                                        | 30                   | 70                    | 73           |
| no                                         | 4                    | 96                    | 28           |
| <b>Total</b>                               |                      |                       | <b>101</b>   |

$\chi^2 = 10.39$ ,  $df = 1$ ,  $p < 0.0013$ .

**Table S3.** CCR Logistic regression model predicting PSS for Communities 2, 3 and 4.

| Model Fit                            | Cross-Validation             |                                         |                                 |
|--------------------------------------|------------------------------|-----------------------------------------|---------------------------------|
| Accuracy                             | 0.72 (standard error = 0.01) |                                         |                                 |
| AUC (Area under curve)               | 0.69 (standard error = 0.02) |                                         |                                 |
| Predictor Variable                   | Standardised Coefficient     | Out of Sample Frequency (n = 2000 Runs) | Contribution to Model (Pratt) % |
| In full-time employment <sup>a</sup> | 1.09                         | 2000                                    | 28%                             |
| Place belonging                      | -0.70                        | 2000                                    | 23%                             |
| Social isolation <sup>b</sup>        | -0.75                        | 1990                                    | 30%                             |
| Car access <sup>a</sup>              | 0.82                         | 1960                                    | 19%                             |

Notes: <sup>a</sup> 1 = yes, 2 = no; <sup>b</sup> 1 = often, 2 = sometimes, 3 = never.

**Table S4.** CCR Logistic regression model predicting PSS for Communities 2, 3 and 4.

| Model Fit                               | Cross-Validation         |                                         |                                 |
|-----------------------------------------|--------------------------|-----------------------------------------|---------------------------------|
| Accuracy                                | 0.62 (s.e. = 0.01)       |                                         |                                 |
| AUC (Area under curve)                  | 0.63 (s.e. = 0.01)       |                                         |                                 |
| Predictor Variables                     | Standardised Coefficient | Out of Sample Frequency (n = 3000 Runs) | Contribution to Model (Pratt) % |
| % green space area                      | -0.59                    | 3000                                    | 20                              |
| Have a garden or allotment <sup>a</sup> | 0.42                     | 3000                                    | 5                               |
| Age                                     | -0.43                    | 3000                                    | 7                               |
| Children <16 in household <sup>a</sup>  | -0.38                    | 3000                                    | 6                               |
| Car access <sup>a</sup>                 | -0.37                    | 3000                                    | 28                              |
| In full-time employment <sup>a</sup>    | 0.25                     | 2894                                    | 24                              |
| Carstairs index                         | -0.20                    | 2449                                    | 4                               |
| Frequency green space visit in winter   | 0.19                     | 2333                                    | 1                               |
| Sex (0 = male, 1 = female)              | 0.19                     | 2308                                    | 4                               |

Notes: *place belonging* and *social isolation* have been removed as predictor variables, <sup>a</sup> 1 = yes, 2 = no.

**Table S5.** Chi-squared test showing relationship between PSS and % green space area, Communities 2, 3 and 4 combined.

| Variable                           | Lower Stress (PSS) % | Higher Stress (PSS) % | Row Freq (n) |
|------------------------------------|----------------------|-----------------------|--------------|
| <b>% green space area (before)</b> |                      |                       |              |
| 24.4–43.7                          | 39.53                | 60.47                 | 43           |
| 44.4–54.0                          | 42.86                | 57.14                 | 49           |
| 54.4–59.3                          | 42.31                | 57.69                 | 52           |
| 60.6–67.5                          | 56.10                | 43.90                 | 41           |
| 69.6–76.3                          | 73.91                | 26.09                 | 46           |
| <b>Total</b>                       |                      |                       | <b>231</b>   |

$$\chi^2 = 15.77, df = 4, p < 0.005.$$

**Table S6.** Chi-squared test showing relationship between PSS and access to garden/allotment, Communities 2, 3 and 4.

| Variable                                   | Lower Stress (PSS) % | Higher Stress (PSS) % | Row Freq (n) |
|--------------------------------------------|----------------------|-----------------------|--------------|
| <b>Access to garden/allotment (before)</b> |                      |                       |              |
| yes                                        | 74.14                | 25.86                 | 58           |
| no                                         | 51.82                | 48.18                 | 110          |
| <b>Total</b>                               |                      |                       | <b>168</b>   |

$$\chi^2 = 8.11, df = 1 p < 0.01.$$

**Table S7.** CCR Logistic regression model predicting general health for Community 1.

| Model Fit                              | Cross-Validation         |                                         |                                 |
|----------------------------------------|--------------------------|-----------------------------------------|---------------------------------|
| Accuracy                               | 0.82 (s.e. = 0.01)       |                                         |                                 |
| AUC (Area under curve)                 | 0.87 (s.e. = 0.02)       |                                         |                                 |
| Predictor Variables                    | Standardised Coefficient | Out of Sample Frequency (n = 3000 Runs) | Contribution to Model (Pratt) % |
| Physical activity (days/month)         | 1.78                     | 2000                                    | 20                              |
| Social isolation <sup>a</sup>          | 1.65                     | 2000                                    | 19                              |
| Education level                        | 1.34                     | 2000                                    | 12                              |
| Place belonging                        | 1.30                     | 2000                                    | 14                              |
| Age                                    | -1.13                    | 2000                                    | 10                              |
| Children <16 in household <sup>b</sup> | -1.09                    | 2000                                    | 10                              |
| Carstairs index                        | -1.22                    | 1996                                    | 4                               |
| Relationship status <sup>c</sup>       | 0.75                     | 1979                                    | 5                               |
| A view of green space/hills from home  | 0.65                     | 1954                                    | 3                               |
| In full-time employment <sup>a</sup>   | -0.60                    | 1834                                    | 3                               |

Notes: <sup>a</sup> 1 = often, 2 = sometimes, 3 = never; <sup>b</sup> 1 = yes, 2 = no; <sup>c</sup> 1 = single, 2 = married/partnered/cohabiting, 3 = divorced/separated or widowed.

**Table S8.** Chi-squared test showing relationship between general health and view of green space/hills from home, Community 1.

| Variable                                               | Very Poor, Poor or Neutral (neither Poor nor Good) Health % | Good and Very Good Health % | Row Freq (n) |
|--------------------------------------------------------|-------------------------------------------------------------|-----------------------------|--------------|
| <b>View of green space or hills from home (before)</b> |                                                             |                             |              |
| no                                                     | 56.60                                                       | 43.4                        | 53           |
| yes                                                    | 33.33                                                       | 66.6                        | 48           |
| <b>Total</b>                                           |                                                             |                             | <b>101</b>   |

$\chi^2 = 5.62, df = 1, p < 0.03.$

**Table S9.** CCR Logistic regression model predicting general health for Community 3.

| Model fit                                 | Cross-Validation         |                                         |                                 |
|-------------------------------------------|--------------------------|-----------------------------------------|---------------------------------|
| Accuracy                                  | 0.73 (s.e. = 0.01)       |                                         |                                 |
| AUC (Area under curve)                    | 0.58 (s.e. = 0.04)       |                                         |                                 |
| Predictor Variable                        | Standardised Coefficient | Out of Sample Frequency (n = 1200 Runs) | Contribution to Model (Pratt) % |
| Frequency of green space visits in winter | 1.49                     | 1740                                    | 100                             |

**Table S10.** Chi-squared test showing relationship between general health and frequency of green space visits in winter, for Community 3.

| Variable                                                  | Very Poor, Poor or Neutral (neither Poor nor Good) Health % | Good & Very Good Health% | Row Freq (n) |
|-----------------------------------------------------------|-------------------------------------------------------------|--------------------------|--------------|
| <b>Frequency of green space visits in winter (before)</b> |                                                             |                          |              |
| Never or at least once/year                               | 90                                                          | 10                       | 31           |
| At least once/month, once/week or daily                   | 65                                                          | 35                       | 67           |
| <b>Total</b>                                              |                                                             |                          | <b>98</b>    |

$\chi^2 = 6.58, df = 1, p < 0.02.$

**Table S11.** CCR Logistic regression model predicting general health for Communities 2 and 4.

| Model Fit                        | Cross-Validation         |                                         |                                 |
|----------------------------------|--------------------------|-----------------------------------------|---------------------------------|
| Accuracy                         | 0.70 (s.e. = 0.01)       |                                         |                                 |
| AUC (Area under curve)           | 0.77 (s.e. = 0.01)       |                                         |                                 |
| Predictor Variable               | Standardised Coefficient | Out of Sample Frequency (n = 2000 Runs) | Contribution to Model (Pratt) % |
| Physical activity level          | 1.40                     | 2000                                    | 44                              |
| Age                              | -1.17                    | 2000                                    | 34                              |
| Relationship status <sup>a</sup> | -0.92                    | 1470                                    | 22                              |

Notes: <sup>a</sup> 1 = single; 2 = married/partnered/cohabiting; 3 = divorced/separated or widowed.

**Table S12.** Significant intercorrelations (Spearman’s rho) between PSS, green space measures and social wellbeing variables, Communities 2, 3 and 4.

| Variable                   | Statistic       | PSS       | % Green Space Area | Have a Garden or Allotment | Place Belonging | Social Isolation |
|----------------------------|-----------------|-----------|--------------------|----------------------------|-----------------|------------------|
| PSS                        | Corr coeff      | 1.000     | -0.220 **          | 0.154 **                   | -0.250 **       | -0.300 **        |
|                            | Sig. (2-tailed) |           | 0.001              | 0.007                      | 0.000           | 0.000            |
|                            | N               | 305       | 231                | 304                        | 301             | 303              |
| % green space area         | Corr coeff      | -0.220 ** | 1.000              | -0.434 **                  | 0.213 **        | 0.003            |
|                            | Sig. (2-tailed) | 0.001     |                    | 0.000                      | 0.001           | 0.962            |
|                            | N               | 231       | 231                | 231                        | 229             | 230              |
| Have a garden or allotment | Corr coeff      | 0.154 **  | -0.434 **          | 1.000                      | -0.338 **       | -0.118 *         |
|                            | Sig. (2-tailed) | 0.007     | 0.000              |                            | 0.000           | 0.041            |
|                            | N               | 304       | 231                | 304                        | 301             | 302              |
| Place belonging            | Corr coeff      | -0.250 ** | 0.213 **           | -0.338 **                  | 1.000           | 0.090            |
|                            | Sig. (2-tailed) | 0.000     | 0.001              | 0.000                      |                 | 0.118            |
|                            | N               | 301       | 229                | 301                        | 301             | 300              |
| Social isolation           | Corr coeff      | -0.300 ** | 0.003              | -0.118 *                   | 0.090           | 1.000            |
|                            | Sig. (2-tailed) | 0.000     | 0.962              | 0.041                      | 0.118           |                  |
|                            | N               | 303       | 230                | 302                        | 300             | 303              |

\* correlation is significant at the 0.05 level (2-tailed); \*\* correlation is significant at the 0.01 level (2-tailed).

**Table S13.** Partial correlation of place belonging with stress, controlling for percentage green space area, Communities 2, 3 and 4.

| Control Variable   | Variable        | Correlations    | PSS    | Place Belonging |
|--------------------|-----------------|-----------------|--------|-----------------|
| % green space area | PSS             | Correlation     | 1.000  | -0.185          |
|                    |                 | Sig. (2-tailed) |        | 0.005           |
|                    |                 | df              | 0      | 226             |
| Place belonging    | Place belonging | Correlation     | -0.185 | 1.000           |
|                    |                 | Sig. (2-tailed) | 0.005  |                 |
|                    |                 | df              | 226    | 0               |

**Table S14.** Partial correlations of place belonging and social isolation with stress, controlling for having a garden or allotment, Communities 2, 3 and 4.

| Control Variable           | Variables                     | Correlations    | PSS    | Place Belonging               |
|----------------------------|-------------------------------|-----------------|--------|-------------------------------|
| Have a garden or allotment | PSS                           | Correlation     | 1.000  | -0.22                         |
|                            |                               | Sig. (2-tailed) |        | 0.001                         |
|                            |                               | df              | 0      | 298                           |
|                            | Place belonging               | Correlation     | -0.22  | 1.000                         |
|                            |                               | Sig. (2-tailed) | 0.001  |                               |
|                            |                               | df              | 298    | 0                             |
| Control Variable           | Variables                     | Correlations    | PSS    | Social isolation <sup>a</sup> |
| Have a garden or allotment | PSS                           | Correlation     | 1.000  | -0.285                        |
|                            |                               | Sig. (2-tailed) |        | 0.001                         |
|                            |                               | df              | 0      | 299                           |
|                            | Social isolation <sup>a</sup> | Correlation     | -0.285 | 1.000                         |
|                            |                               | Sig. (2-tailed) | 0.001  |                               |
|                            |                               | df              | 299    | 0                             |

<sup>a</sup> a higher score means less social isolation.

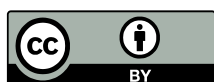

© 2016 by the authors; licensee MDPI, Basel, Switzerland. This article is an open access article distributed under the terms and conditions of the Creative Commons by Attribution (CC-BY) license (<http://creativecommons.org/licenses/by/4.0/>).
